# Supplementary material for: Introduction of a (Ph3P)2Pt group into the rim of an open-cage fullerene by breaking a carbon–carbon bond
Source: Royal Society of Chemistry journal article supplement (doi:10.1039/d1cc04336f), 2021-01-01
Supplement: d1cc04336f1.pdf [file d1cc04336f1.pdf]

## Supporting Information for:

# Introduction of a $(\text{Ph}_3\text{P})_2\text{Pt}$ Group into the Rim of an Open-cage Fullerene by Breaking a Carbon-Carbon Bond.

By Steven Gralinski, Mrityika Roy, Lilia M. Baldauf, Marilyn M. Olmstead, Alan L. Balch\*

**Preparation of  $(\text{Ph}_3\text{P})_2\text{Pt}$ -MMK-9 (1).** MMK-9 and  $\text{Pt}(\text{PPh}_3)_4$  were prepared in accordance with literature methods.<sup>1,2</sup> The cage-opening reagent 3-(2-Pyridyl)-5,6-diphenyl-1,2,4-triazine was purchased from Sigma-Aldrich and used without further purification, whereas the solvents toluene, hexanes (mixture of isomers), ethyl acetate and 1-chloronaphthalene were purchased from Sigma-Aldrich and degassed over molecular sieves prior to use, as needed.  $\text{C}_{60}$  was purchased from SES Research Inc. and used without further purification.

A purged and nitrogen-backfilled round bottom flask was charged with 19 mg of  $(\text{Ph}_3\text{P})_4\text{Pt}$  (0.015 mmol), which was dissolved in 15 mL of degassed toluene. To this solution, a separate solution of 11.5 mg of MMK-9 (0.011 mmol) in 20 mL toluene was added. A color change from yellow to brown to black was observed within seconds. The reaction mixture was stirred at room temperature for 90 minutes. Subsequently the reaction mixture was evaporated to ~1 mL under reduced pressure. The residue was subjected to column chromatography (eluent, 20:1 toluene:EtOAc; support, silica gel) giving first an orange band that contained MMK-9 followed by a broad black band that contained  $(\text{Ph}_3\text{P})_2\text{Pt}$ -MMK-9 (1) (12.2 mg, 0.007 mmol, 46%). Single crystals for X-ray diffraction were prepared by slow diffusion of hexanes (mixture of isomers) into a solution of  $(\text{Ph}_3\text{P})_2\text{Pt}$ -MMK-9 in 3:1  $\text{CS}_2$ :hexanes to produce the solvate  $(\text{Ph}_3\text{P})_2\text{Pt}$ -MMK-9•*n*-hexane•methylcyclopentane. Diffusion of pentane into a benzene solution of  $(\text{Ph}_3\text{P})_2\text{Pt}$ -MMK-9 (1) yielded another solvate,  $(\text{Ph}_3\text{P})_2\text{Pt}$ -MMK-9•3benzene.

**Characterization.** Cyclic voltammetry was carried out on a CHE 610E Electrochemical Analyzer using a three-electrode cell with a glassy carbon working electrode, a platinum wire counter electrode, and a Ag/0.01M AgCl reference electrode. The potentials were calibrated against ferrocene added as an internal standard after each measurement. Infrared (IR) spectra were recorded on a Bruker Alpha FT-IR spectrometer using attenuated total reflectance (ATR). Ultraviolet-visible (UV-vis) spectra of benzene solutions of MMK-9 and  $(\text{Ph}_3\text{P})_2\text{Pt}$ -MMK-9 in quartz cuvettes were recorded on a Shimadzu UV-3600 UV-vis NIR spectrophotometer.

### Spectral Data.

**MMK-9:** M.p. >210 °C; IR (solid):  $\nu = 1700 \text{ cm}^{-1}$ ,  $1744 \text{ cm}^{-1}$  (C=O); UV/Vis ( $\text{C}_6\text{H}_6$ ):  $\lambda_{\text{max}}$  (log $\epsilon$ ) = 331 nm (4.29), 425 nm (3.75).

**$(\text{Ph}_3\text{P})_2\text{Pt}$ -MMK-9 (1):** M.p. >210 °C; IR (solid):  $\nu = 1685 \text{ cm}^{-1}$ ,  $1731 \text{ cm}^{-1}$  (C=O); UV/Vis ( $\text{C}_6\text{H}_6$ ):  $\lambda_{\text{max}}$  (log $\epsilon$ ) = 295 nm (4.62), 438 nm (3.84), 570 nm (3.43).

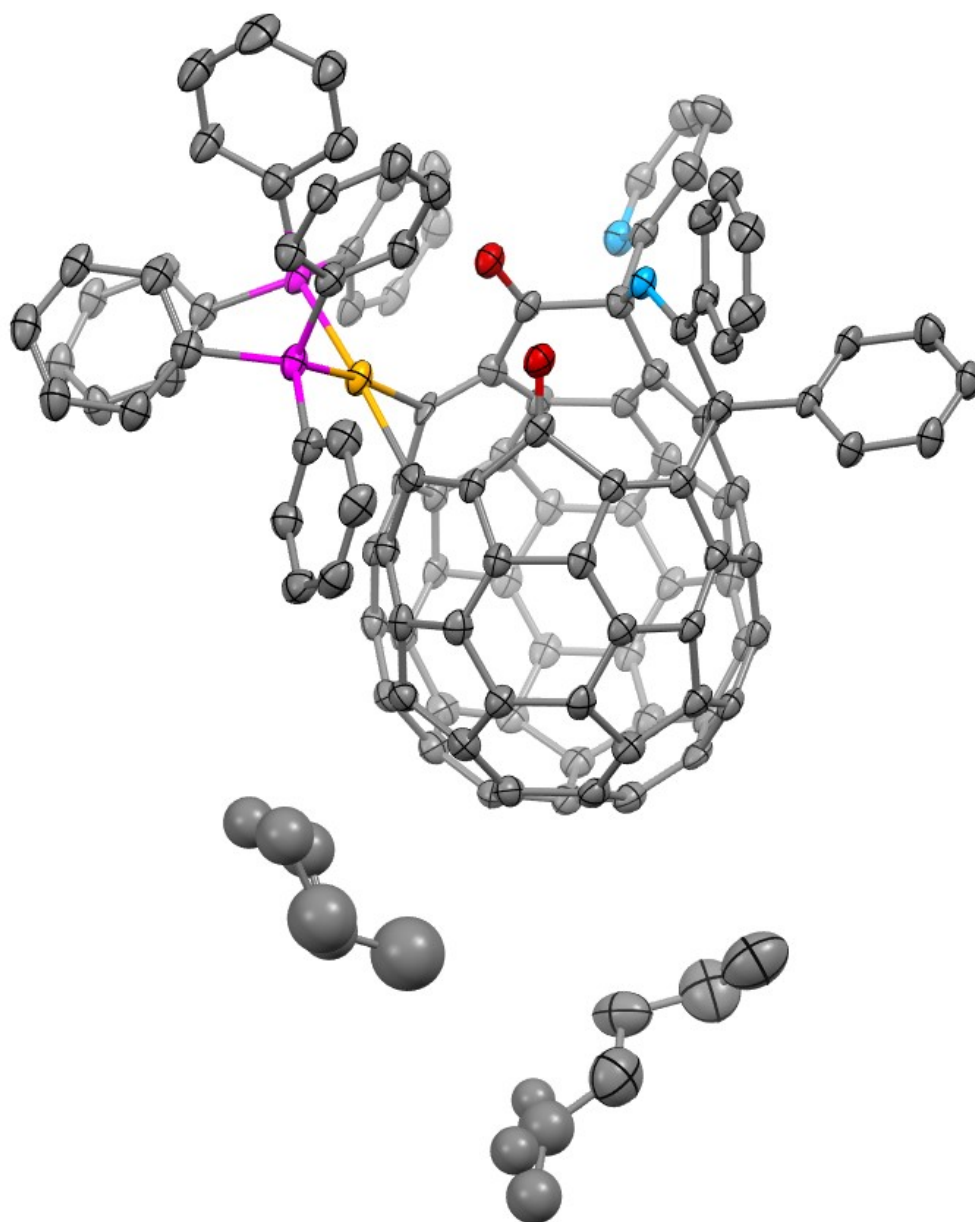

Figure SI-1. A drawing of  $(\text{Ph}_3\text{P})_2\text{Pt-MMK-9}\cdot n\text{-hexane}\cdot\text{methylcyclopentane}$  showing the molecular structure and the location of the disordered solvate molecules.

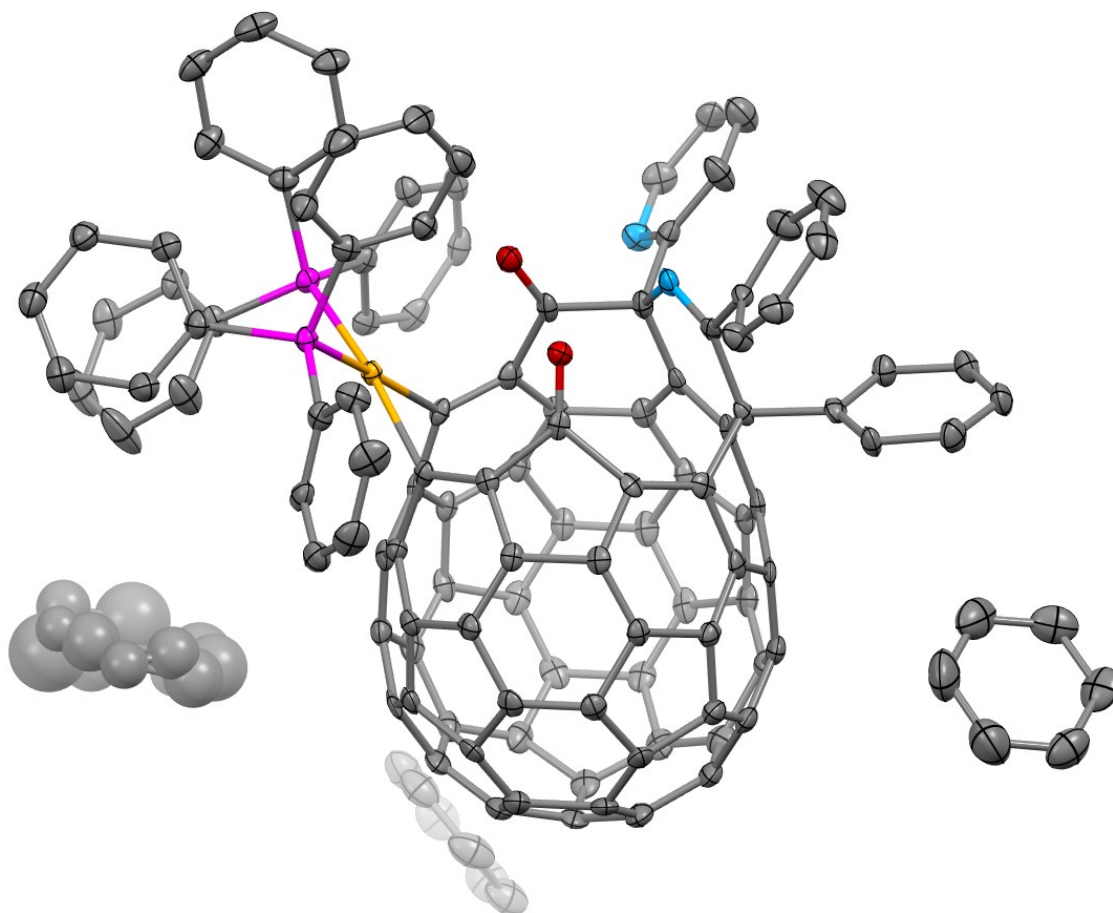

Figure SI-2. A drawing of  $(\text{Ph}_3\text{P})_2\text{Pt-MMK-9}\cdot 3\text{benzene}$  showing the molecular structure and the location of the disordered solvate molecules.

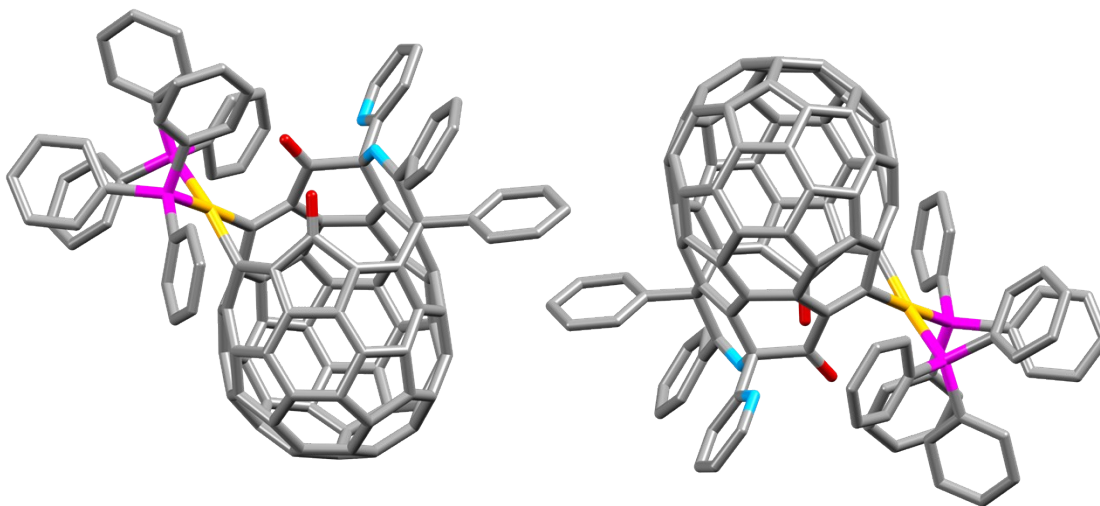

Figure SI-3. A drawing of the two enantiomers of  $(\text{Ph}_3\text{P})_2\text{Pt-MMK-9}$  (**1**) packed about a center of symmetry in crystals of the benzene solvate  $(\text{Ph}_3\text{P})_2\text{Pt-MMK-9}\cdot 3\text{benzene}$ .

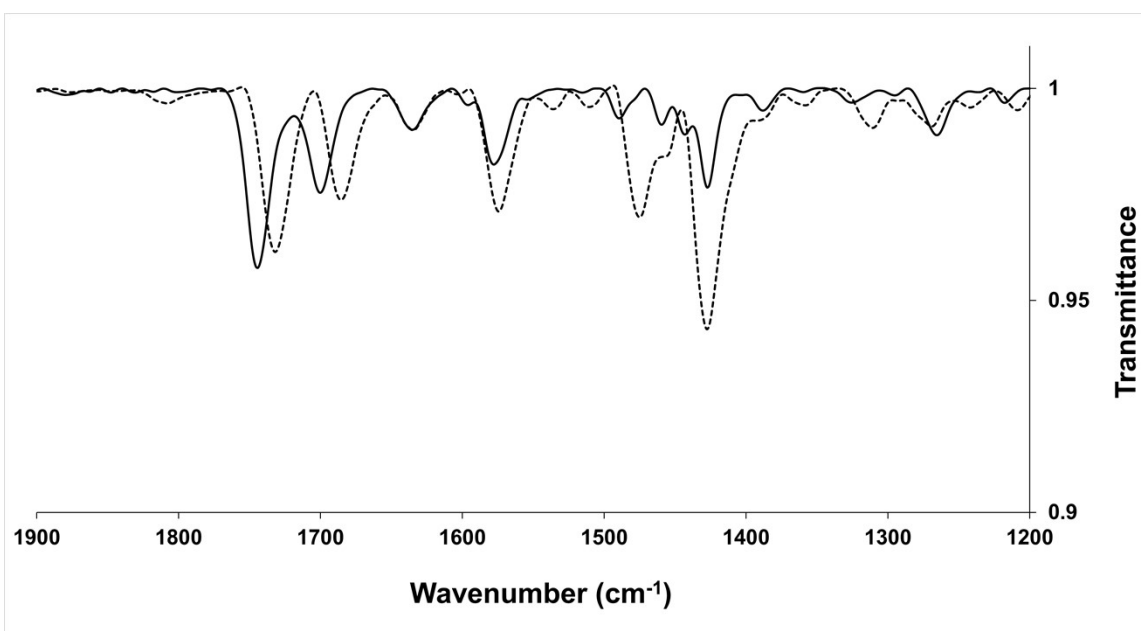

**Figure SI-4.** A portion of the infrared spectra of crushed crystals of  $(\text{Ph}_3\text{P})_2\text{Pt-MMK-9}$  (**1**) (dashed line) at the top and MMK-9 (solid line). IR spectra were recorded on a Bruker Alpha FT-IR spectrometer using attenuated total reflectance (ATR).

#### **Crystal Structure Procedures:**

Hexanes (mixed) solvate: A crystal of compound **1** was mounted on in the 90 K nitrogen cold stream provided by a Cryo Industries cryostat low temperature apparatus on a Bruker Apex II diffractometer employing a fine-focus Mo sealed tube ( $\lambda = 0.71043 \text{ \AA}$ ). Dataset was reduced with the use of Bruker SAINT<sup>3</sup>, and a multi-scan absorption correction was applied with the use of SADABS. Structure solutions and refinements were conducted with SHELXT-2018.<sup>4</sup>

Benzene solvate: A crystal of compound **1** was mounted in the 100 K nitrogen cold stream provided by an Oxford Cryostream low temperature apparatus on a Bruker Venture Kappa DUO diffractometer. Data were collected with the use of a molybdenum microsource ( $\lambda = 0.71073 \text{ \AA}$ ). Dataset was reduced with the use of Bruker SAINT,<sup>3</sup> and a multiscan absorption correction was applied with the use of SADABS. Structure solutions and refinements were conducted with SHELXT-2018.<sup>4</sup>

---

<sup>1</sup>

<sup>2</sup> Malatesta, M.; Cariello, C. Platinum(0) Compounds with Triarylphosphines and Analogous Ligands. *J. Chem. Soc.*, **1958**, 2323-2328

<sup>3</sup> SAINT and SADABS, Bruker AXS Inc., Madison, WI, 2018

<sup>4</sup> Sheldrick, G. M. *Acta Crystallogr., Sect. C: Struct. Chem.*, **2015**, 71, 3-8
